# Supplementary material for: Enhanced C2+selectivity in plasma-assisted chemical looping oxidative coupling of methane using (Na, Li, and K) doped LaMnO3
Source: Royal Society of Chemistry journal article supplement (doi:10.1039/d3se00292f), 2023-01-01
Supplement: d3se00292f1.pdf [file d3se00292f1.pdf]

## Supplementary information

# Enhanced C<sub>2+</sub> Selectivity in Plasma-assisted Chemical Looping Oxidative Coupling of Methane using (Na, Li, and K) doped LaMnO<sub>3</sub>

Tong Liu, Chen Wang, Wentao Ou, Rui Xiao and Dewang Zeng \*

*Key Laboratory of Energy Thermal conversion and control of Ministry of Education, School of Energy and Environment, Southeast University, Nanjing 210096, PR China*

\*Corresponding author

E-mail: [dwzeng@seu.edu.cn](mailto:dwzeng@seu.edu.cn)

Table S1. Fixed bed experimental procedure.

|   | Gas                  | Gas flow rate (ml/min) | Reaction time | Reaction type      |
|---|----------------------|------------------------|---------------|--------------------|
| 1 | N <sub>2</sub>       | 100                    | 30 min        | Purging            |
| 2 | Pure CH <sub>4</sub> | 50                     | 30 s          | Reduction reaction |
| 3 | N <sub>2</sub>       | 100                    | 30 min        | Purging            |
| 4 | Air                  | 100                    | 20 min        | Oxidation reaction |

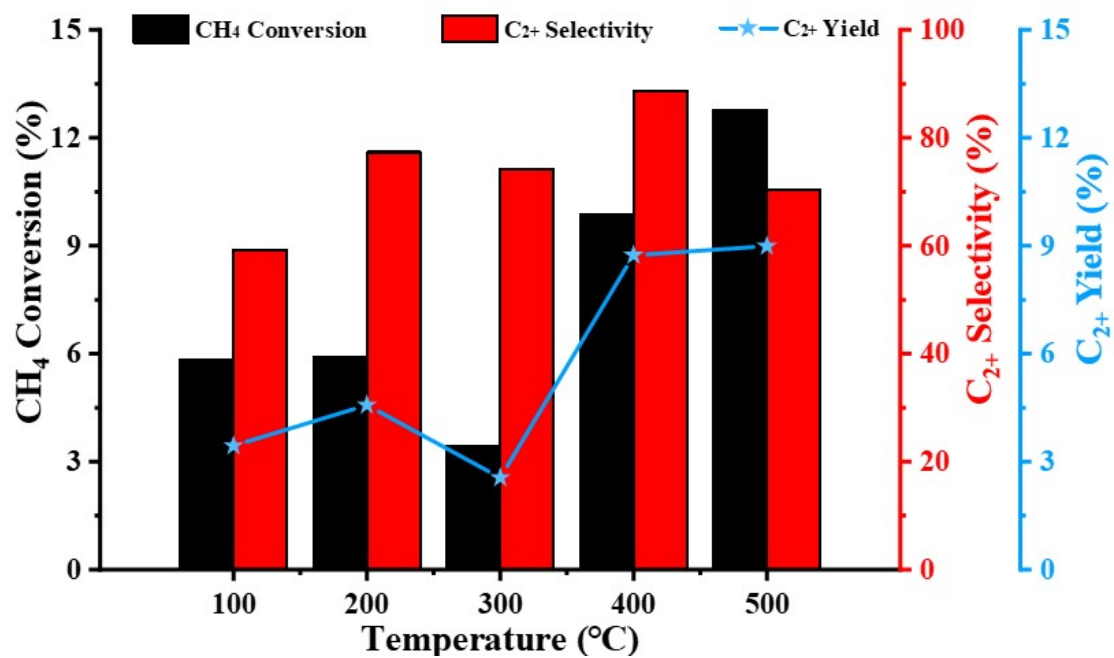

Fig. S1. Plasma-assisted CLOCM performance of K-LaMnO<sub>3</sub> at different temperatures (plasma discharge power: 50 W).

Table S2. Comparison of oxidative coupling of methane performance in the work with Those with similar systems.

| Catalyst                                                        | Temperature (°C) | CH <sub>4</sub> Conversion (%) | C <sub>2+</sub> Selectivity (%) | C <sub>2+</sub> Yield (%) | Method                        | Author                  |
|-----------------------------------------------------------------|------------------|--------------------------------|---------------------------------|---------------------------|-------------------------------|-------------------------|
| Na-LaMnO <sub>3</sub>                                           | 400              | 9.9                            | 73.9                            | 7.3                       | Plasma-assisted CLOCM         | This work               |
| Li-LaMnO <sub>3</sub>                                           | 400              | 2.2                            | 43.8                            | 0.9                       | Plasma-assisted CLOCM         | This work               |
| K-LaMnO <sub>3</sub>                                            | 400              | 9.8                            | 88.7                            | 8.7                       | Plasma-assisted CLOCM         | This work               |
| FeMnO <sub>3</sub> -Na <sub>2</sub> WO <sub>4</sub>             | 800              | 20                             | 80                              | 16                        | Chemical looping OCM          | Sun <sup>1</sup>        |
| Na-Mg <sub>6</sub> MnO <sub>8</sub>                             | 850              | 27.9                           | 82.9                            | 23.2                      | Chemical looping OCM          | Huang <sup>2</sup>      |
| La <sub>2</sub> Ce <sub>2</sub> O <sub>7</sub>                  | 750              | 26.6                           | 62.4                            | 16.6                      | Oxidative coupling of methane | Xu <sup>3</sup>         |
| Na <sub>2</sub> WO <sub>4</sub> /Mn/SiO <sub>2</sub>            | 850              | 32                             | 45                              | 14.4                      | OCM                           | Lee <sup>4</sup> □      |
| Ag/SiO <sub>2</sub>                                             | 385              | 27.3                           | 35.7                            | 9.7                       | Plasma-assisted OCM           | Lee <sup>5</sup>        |
| Ag/Glass bead                                                   | 385              | \                              | \                               | 4.5                       | Plasma-assisted OCM           | Lee <sup>5</sup>        |
| Ag/γ-Al <sub>2</sub> O <sub>3</sub>                             | 385              | \                              | \                               | 4.0                       | Plasma-assisted OCM           | Lee <sup>5</sup>        |
| Ag/TiO <sub>2</sub>                                             | 385              | \                              | \                               | 1.9                       | Plasma-assisted OCM           | Lee <sup>5</sup>        |
| Ag/BaTiO <sub>3</sub>                                           | 385              | \                              | \                               | 1.8                       | Plasma-assisted OCM           | Lee <sup>5</sup>        |
| La/ZrO <sub>2</sub>                                             | 150              | 3                              | 31.2                            | 0.9                       | Thermal catalytic             | Oshima <sup>6</sup>     |
| Ba/La <sub>2</sub> O <sub>3</sub>                               | 150              | 6.3                            | 32.3                            | 2.0                       | Thermal catalytic             | Oshima <sup>6</sup> □   |
| Na <sub>2</sub> WO <sub>4</sub> /La <sub>2</sub> O <sub>3</sub> | 750              | 2                              | 50                              | 1.0                       | Oxidative coupling of methane | Yildiz <sup>7</sup> □   |
| (Li, W)-Mg <sub>6</sub> MnO <sub>8</sub>                        | 850              | 49                             | 58.4                            | 26.8                      | Chemical looping OCM          | Baser <sup>8</sup>      |
| Li/BaSrTiO <sub>3</sub>                                         | 800              | 37                             | 59.5                            | 22.0                      | Oxidative coupling of methane | Farzaneh <sup>9</sup> □ |
| CaO/SiO <sub>2</sub>                                            | 800              | 40                             | 50                              | 20.0                      | Oxidative coupling of methane | An et al.□              |
| LaInO <sub>3</sub>                                              | 800              | 15.4                           | 53.6                            | 8.3                       | Oxidative coupling of methane | Tanaka <sup>10</sup> □  |
| La <sub>0.6</sub> Ba <sub>0.4</sub> InO <sub>3-x</sub>          | 800              | 21.4                           | 61.1                            | 13.1                      | Oxidative coupling of methane | Tanaka <sup>10</sup> □  |
| Li/SmzO <sub>3</sub> /MgO                                       | 800              | 24                             | 64.0                            | 15.4                      | Oxidative coupling of methane | Elkins <sup>11</sup> □  |
| Li/MgO                                                          | 800              | 38.05                          | 35.2                            | 13.4                      | Oxidative coupling of methane | Raouf <sup>12</sup> □   |

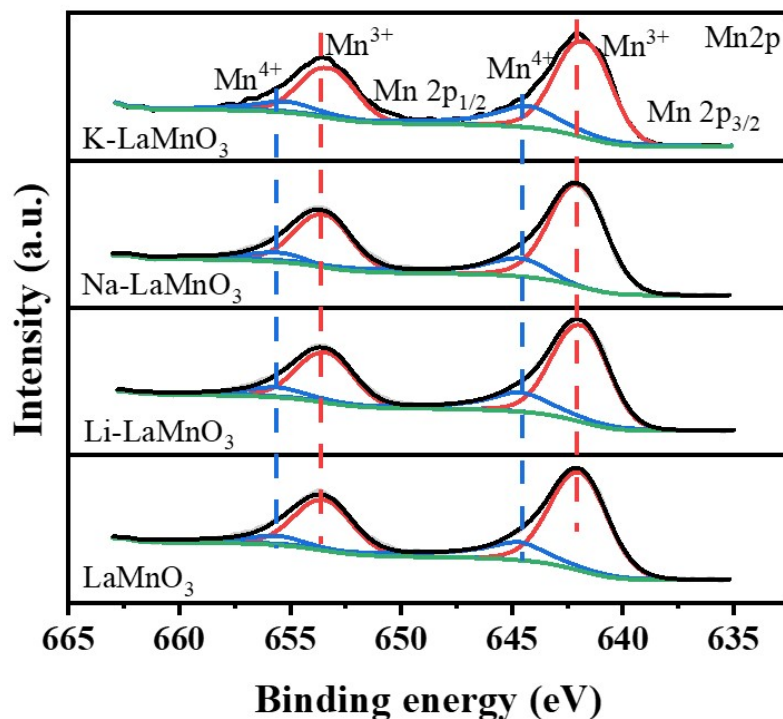

Fig. S2. Mn 2p XPS spectra of the corresponding X-LaMnO<sub>3</sub> (X=Na, Li, and K) and undoped LaMnO<sub>3</sub> oxygen carriers.

Table S3. The quantitative analysis results of Manganese distribution.

| Sample                 | Manganese distribution (%) |                  |                                     |
|------------------------|----------------------------|------------------|-------------------------------------|
|                        | Mn <sup>4+</sup>           | Mn <sup>3+</sup> | Mn <sup>4+</sup> / Mn <sup>3+</sup> |
| LaMnO <sub>3</sub>     | 23.57                      | 76.43            | 0.31                                |
| Li- LaMnO <sub>3</sub> | 24.48                      | 75.52            | 0.32                                |
| Na- LaMnO <sub>3</sub> | 21.93                      | 78.07            | 0.28                                |
| K- LaMnO <sub>3</sub>  | 27.11                      | 72.89            | 0.37                                |

The Mn 2p XPS spectra showed that K doping increased the relative content of Mn<sup>4+</sup> in the oxygen carrier, which in turn enhanced the redox properties of the oxygen carrier<sup>2</sup>. The ratio of Mn<sup>4+</sup>/Mn<sup>3+</sup> follows the trend of K-LaMnO<sub>3</sub> > Li- LaMnO<sub>3</sub> > LaMnO<sub>3</sub> > Na- LaMnO<sub>3</sub>.

## Reference

1. W. Sun, G. Zhao, Y. Gao, J. Si, Y. Liu and Y. Lu, *Appl. Catal. B*, 2022, **304**.
2. J. Huang, K. Zhao, S. Jiang, S. Kang, Y. Lin, Z. Huang, A. Zheng and Z. Zhao, *Fuel Process. Technol.*, 2022, **235**.
3. J. W. Xu, L. Peng, X. Z. Fang, Z. Y. Fu, W. M. Liu, X. L. Xu, H. G. Peng, R. Y. Zheng and X. Wang, *Appl. Catal. a-Gen.*, 2018, **552**, 117-128.
4. J. Y. Lee, W. Jeon, J.-W. Choi, Y.-W. Suh, J.-M. Ha, D. J. Suh and Y.-K. Park, *Fuel*, 2013, **106**, 851-857.
5. H. Lee, D.-H. Lee, J. M. Ha and D. H. Kim, *Appl. Catal. a-Gen.*, 2018, **557**, 39-45.
6. K. Oshima, K. Tanaka, T. Yabe, E. Kikuchi and Y. Sekine, *Fuel*, 2013, **107**, 879-881.
7. M. Yildiz, Y. Aksu, U. Simon, K. Kailasam, O. Goerke, F. Rosowski, R. Schomaecker, A. Thomas and S. Arndt, *Chem. Commun. (Cambridge, U. K.)*, 2014, **50**, 14440-14442.
8. D. S. Baser, Z. Cheng, J. A. Fan and L.-S. Fan, *ACS Sustain. Chem. Eng.*, 2021, **9**, 2651-2660.
9. Z. Fakhroueian, F. Farzaneh and N. Afrookhteh, *Fuel*, 2008, **87**, 2512-2516.
10. K. Tanaka, Y. Sekine, J. Inoue, H. Araki, M. Matsukata and E. Kikuchi, *J. Jpn. Pet. Inst.*, 2012, **55**, 71-72.
11. T. W. Elkins, B. Neumann, M. Baeumer and H. E. Hagelin-Weaver, *Acs Catal.*, 2014, **4**, 1972-1990.
12. F. Raouf, M. Taghizadeh and M. Yousefi, *React. Kinet. Mech. Cat.*, 2013, **110**, 373-385.
